# Supplementary material for: GSK-3β and ERK1/2 incongruously act in tau hyperphosphorylation in SPS-induced PTSD rats
Source: publisher site journal article supplement (doi:10.18632/aging.102303), 2019-09-23
Supplement: Supplementary file [file aging-v11i18-102303-supplementary-material-SD1.pdf]

## SUPPLEMENTARY FIGURES

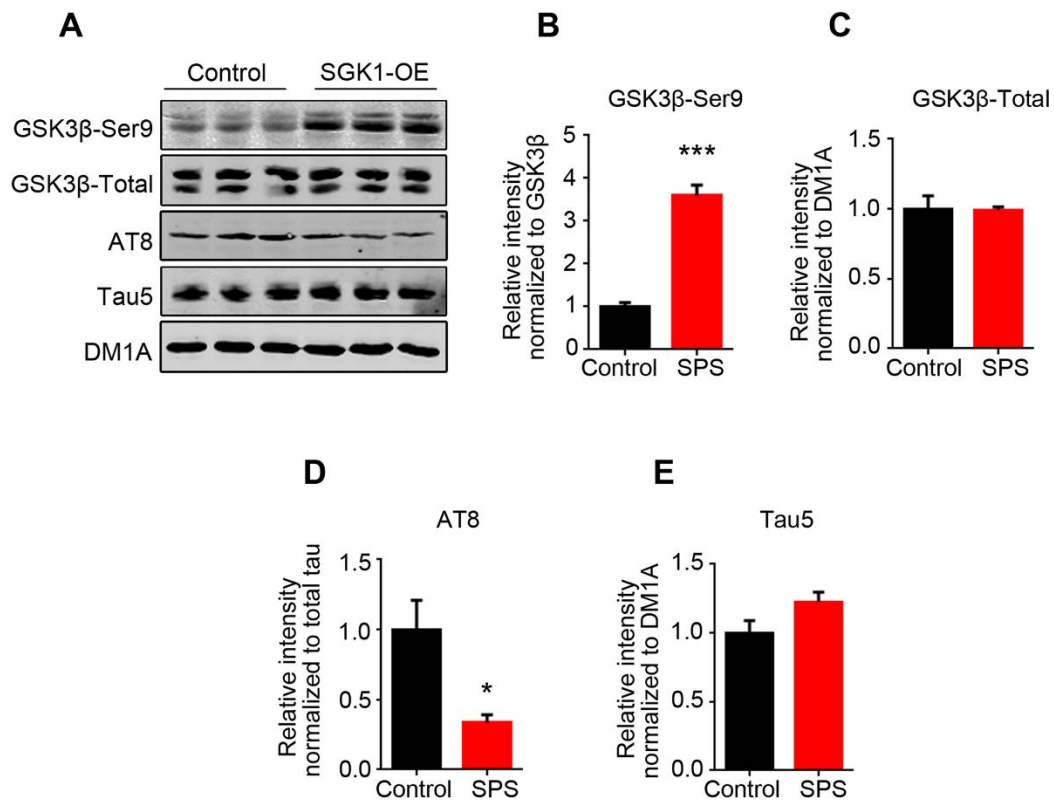

**Supplementary Figure 1. Overexpression of SGK1 inhibits the GSK3β in HEK293/tau cells.** HEK293/Tau cells were transfected with SGK1. (A) Western blot was performed to detect GSK3β and tau. SGK1 overexpression increased phosphorylation of GSK3β at Ser9 and decreased phosphorylation of tau at Ser202/Thr205 (AT8). (B–E) Quantitative analysis for blots in A.

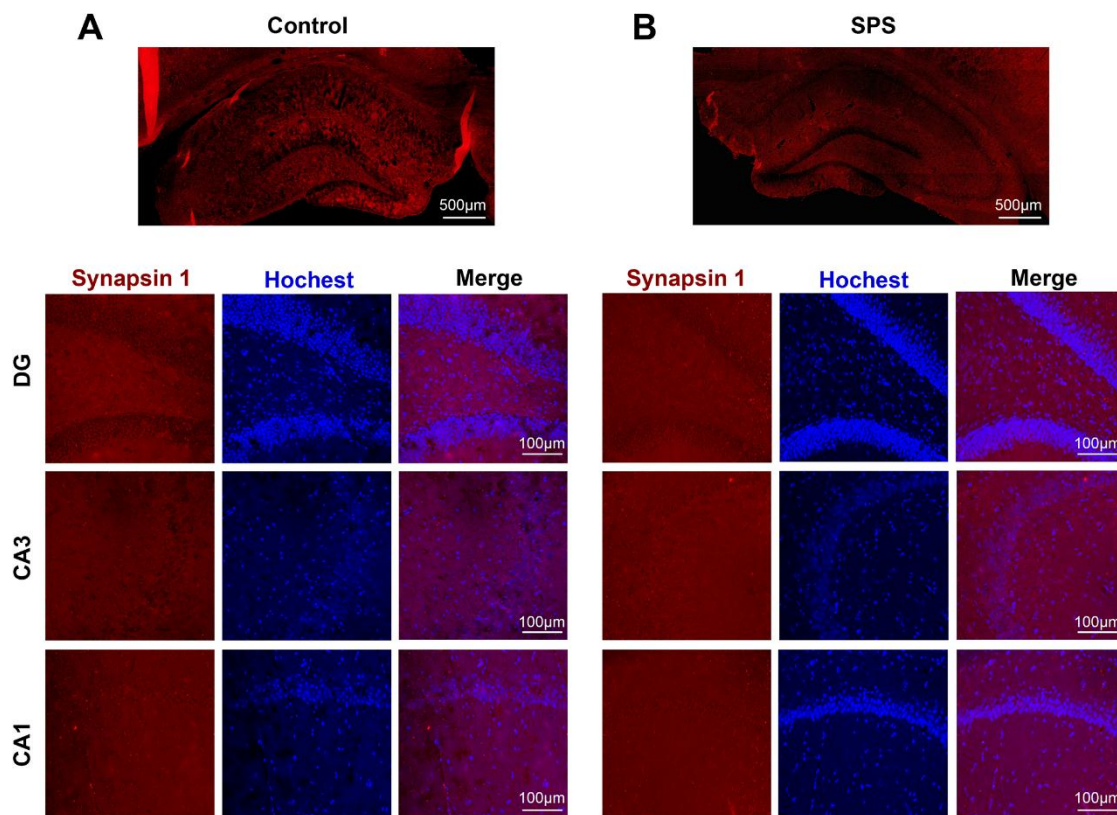

**Supplementary Figure 2. Synapsin 1 in hippocampus of SPS rats.** Immunofluorescence images stained with synapsin 1 (red) in hippocampus of control (A) and SPS rats (B). Nuclei were counterstained in hoechst (blue). Upper row scale bar, 500µm; lower row scale bar, 100µm
